# Supplementary material
Source: PubMed Central journal article supplement (PMC3521165)

A

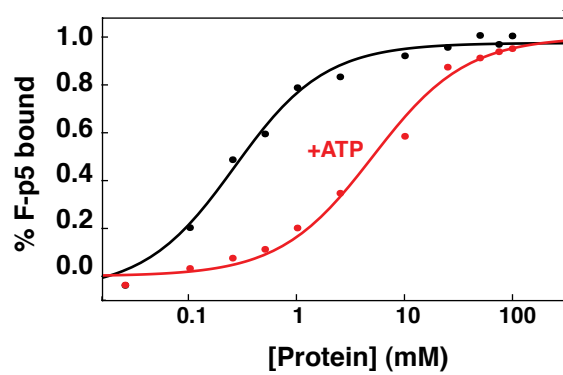

B

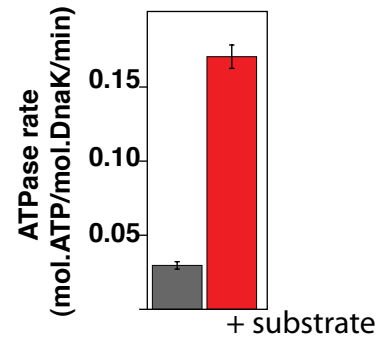

C

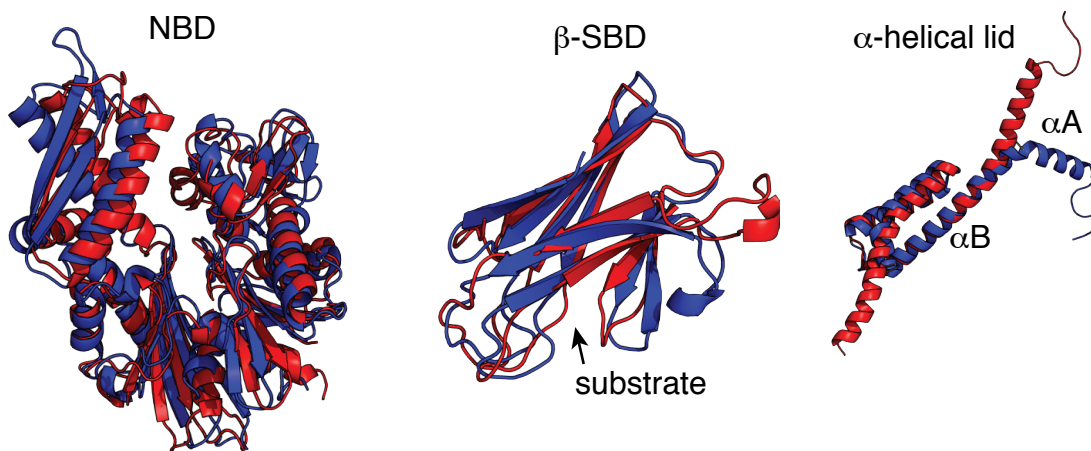

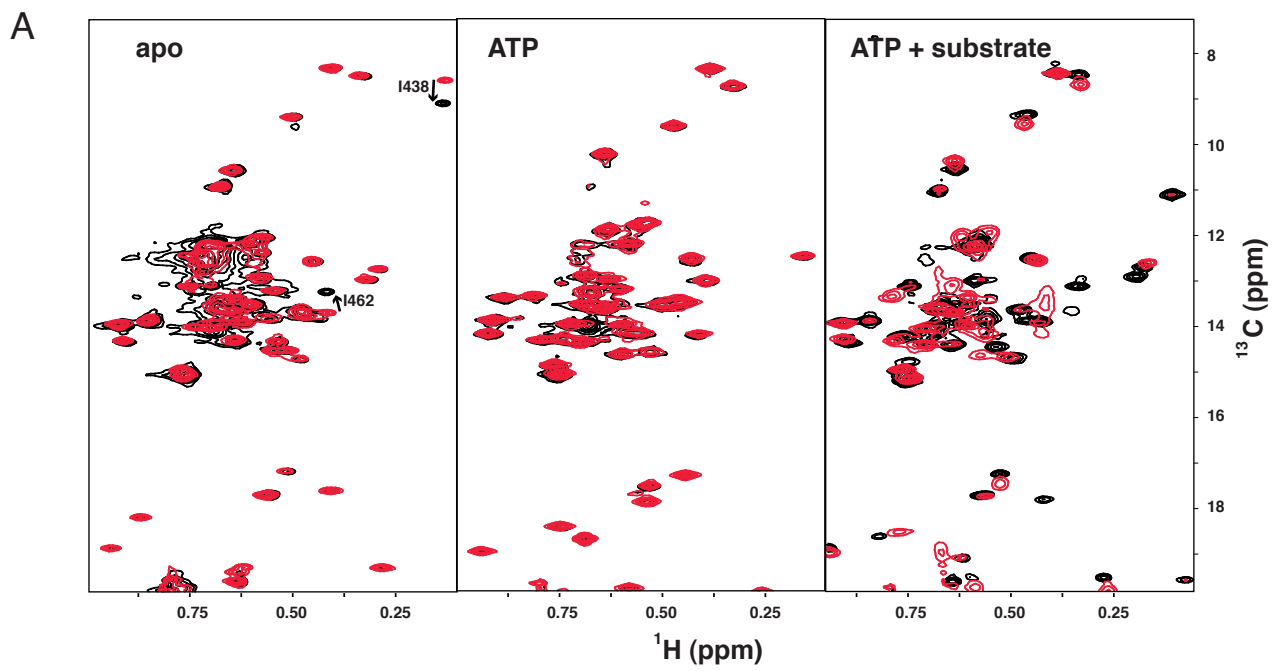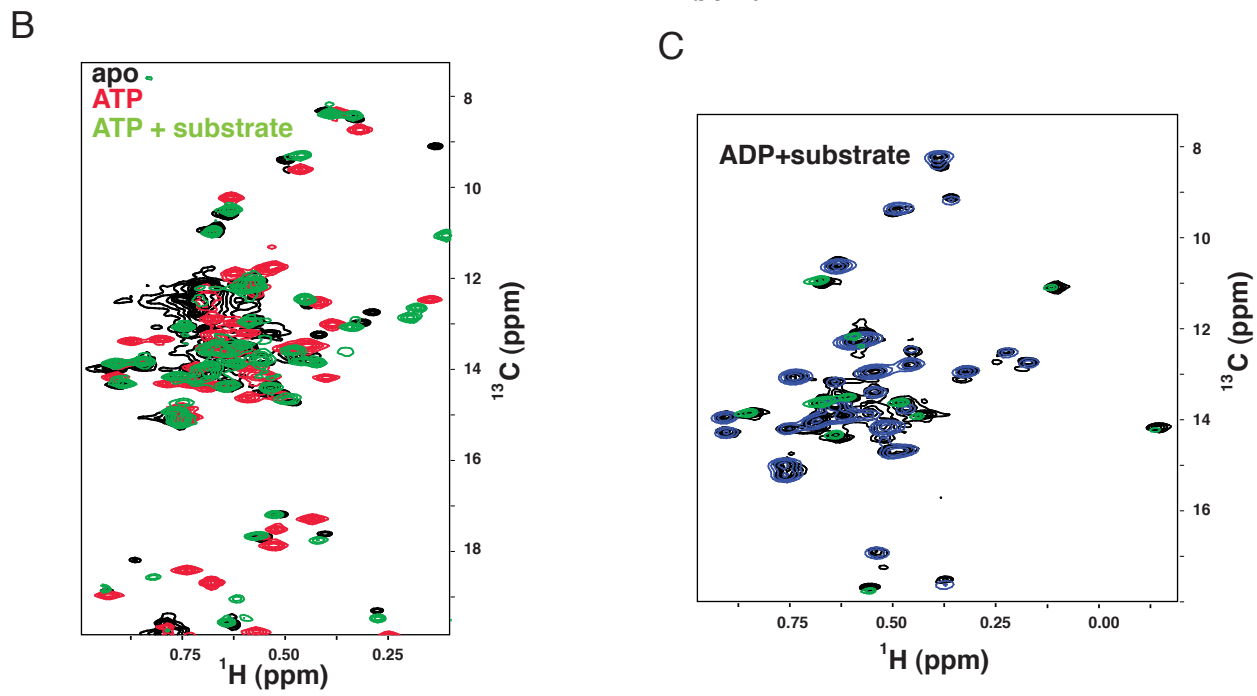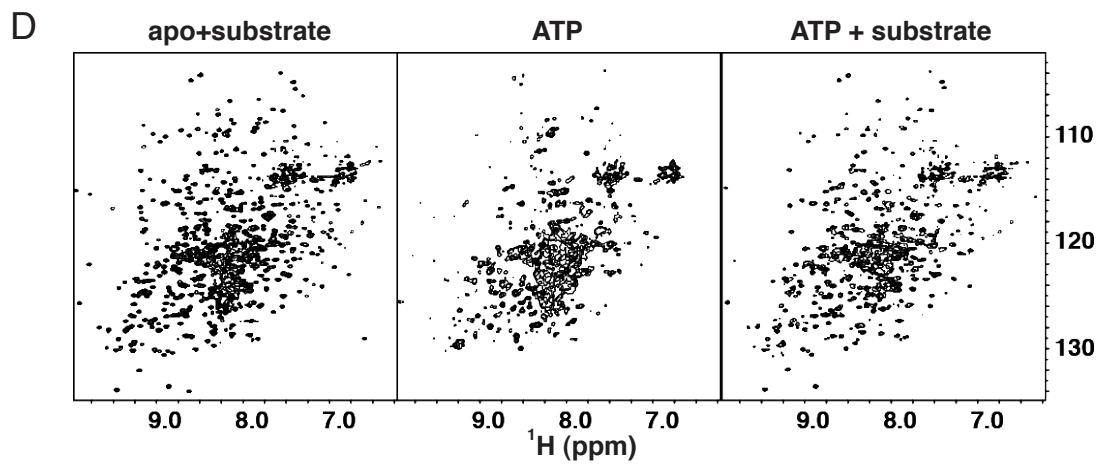

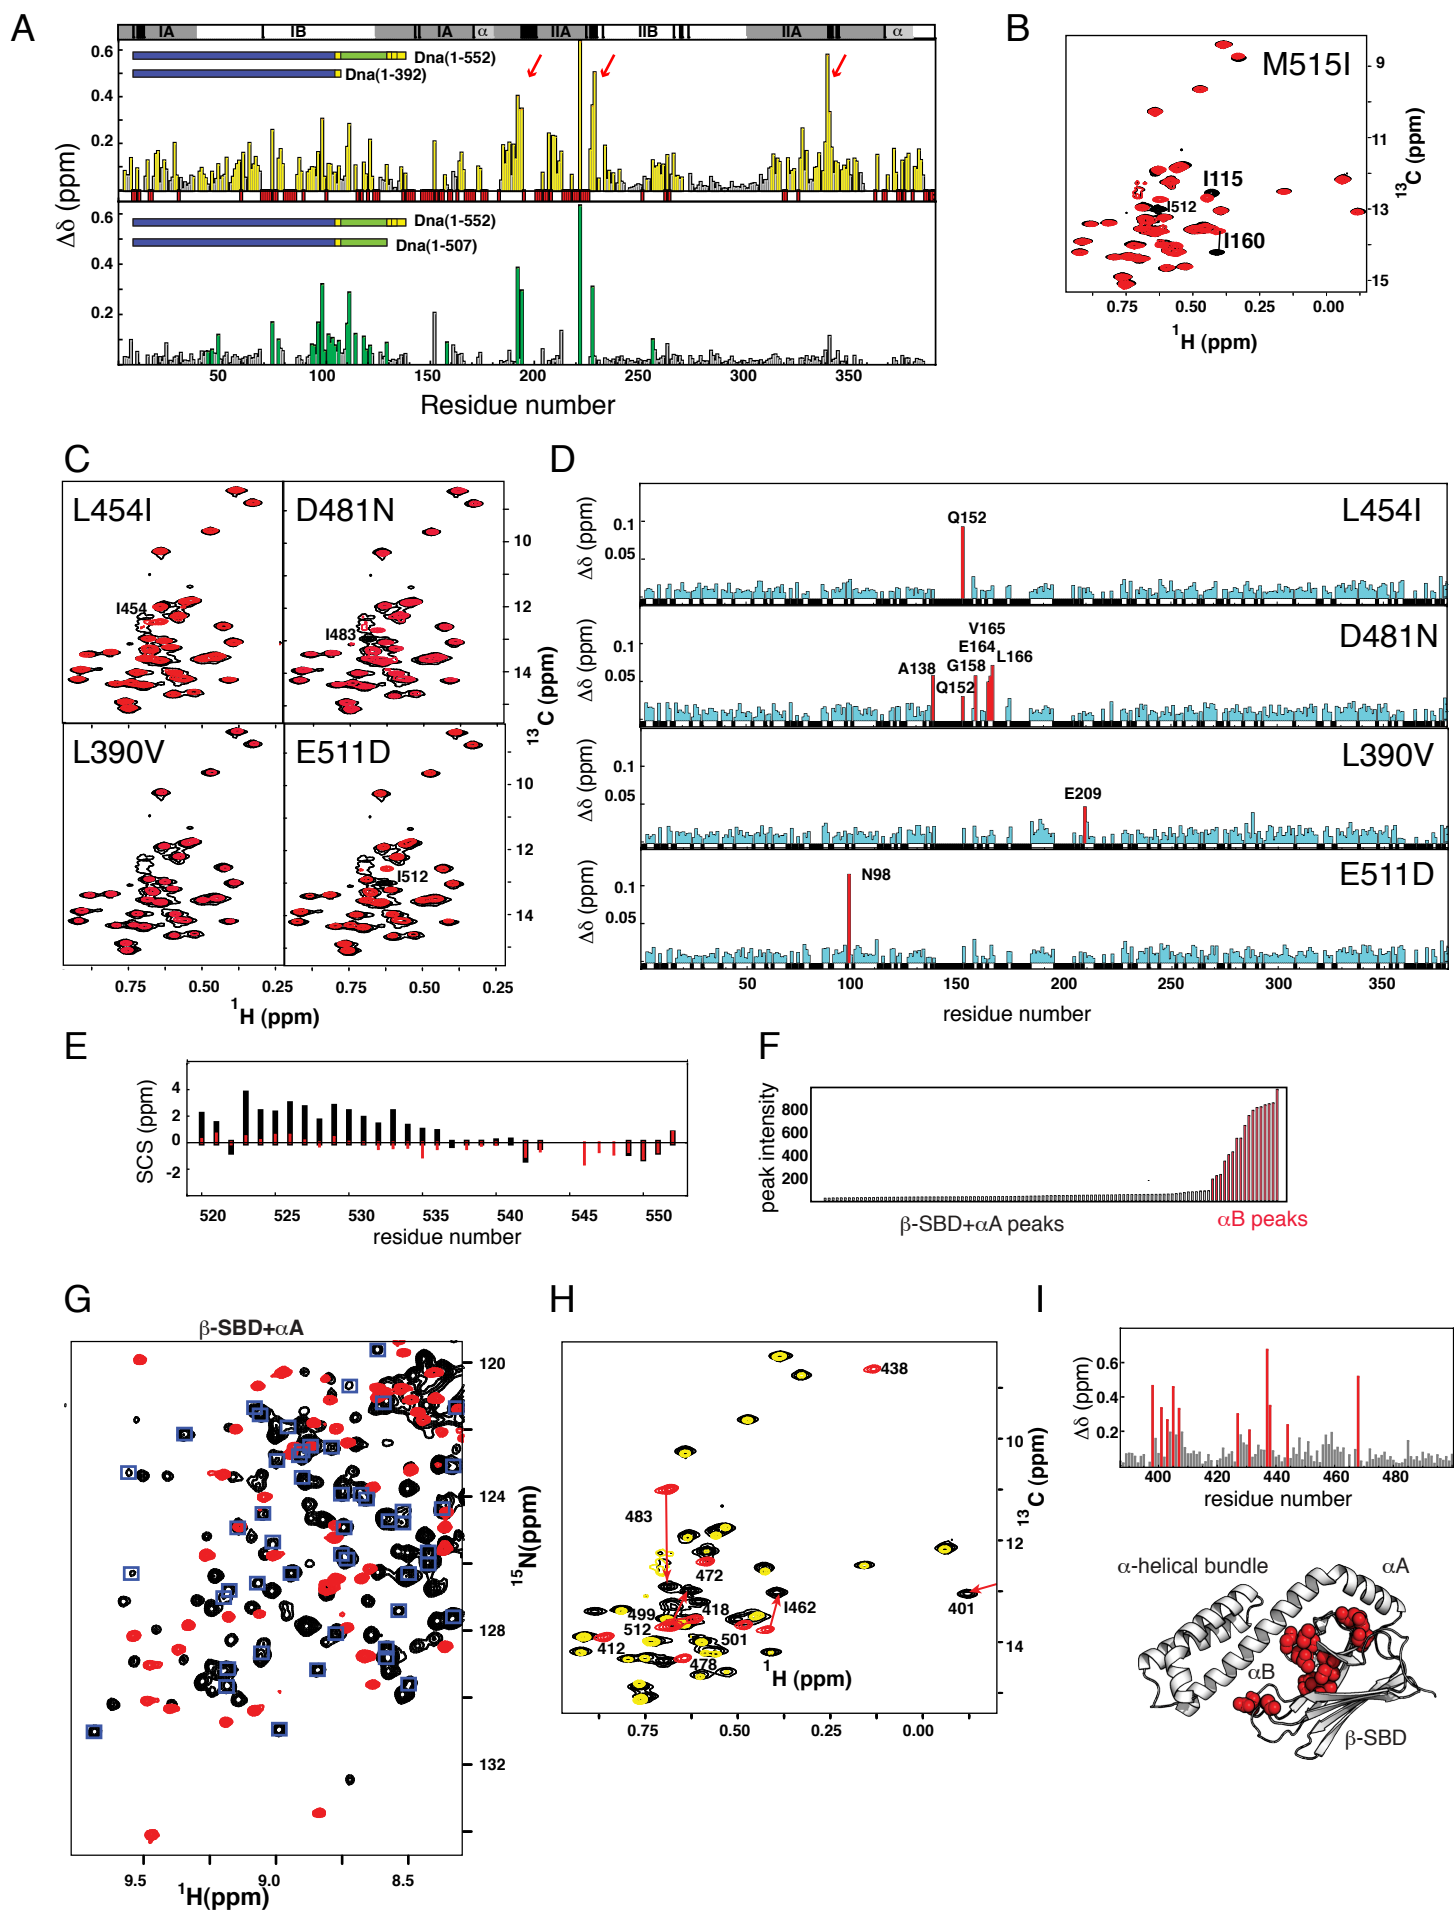

A

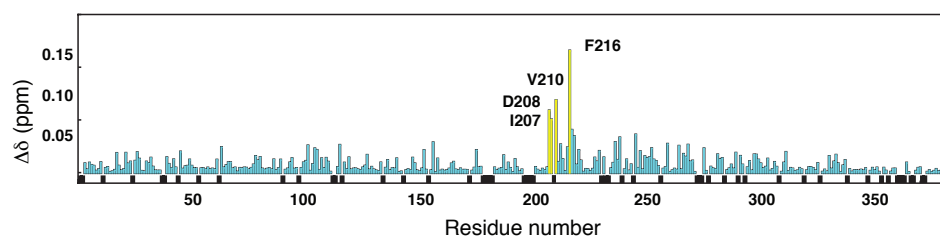

B

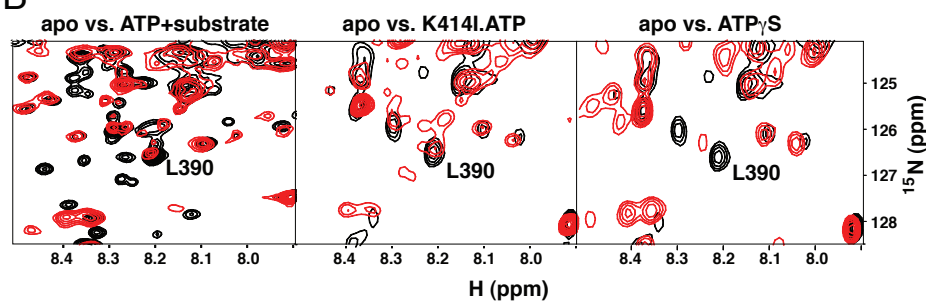

C

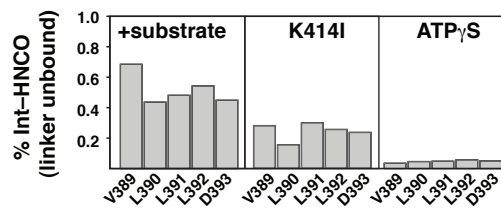

D

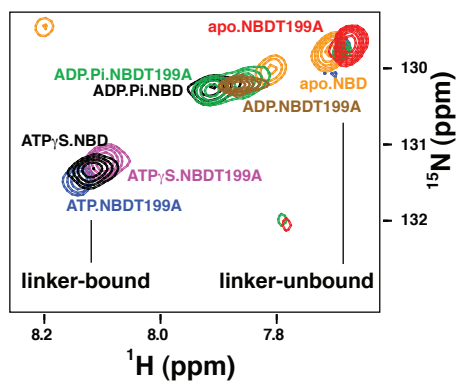

E

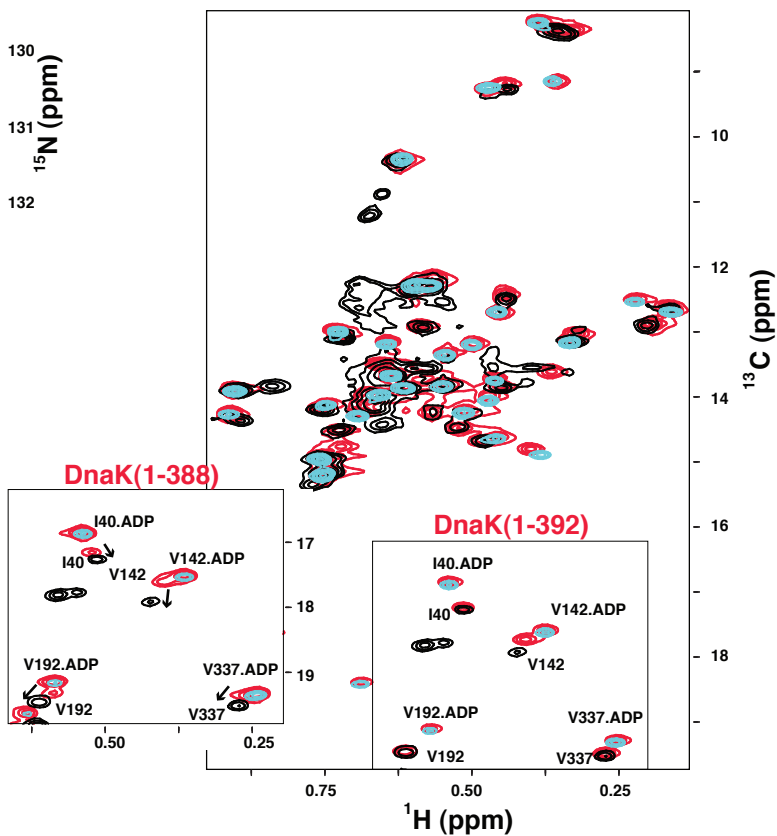

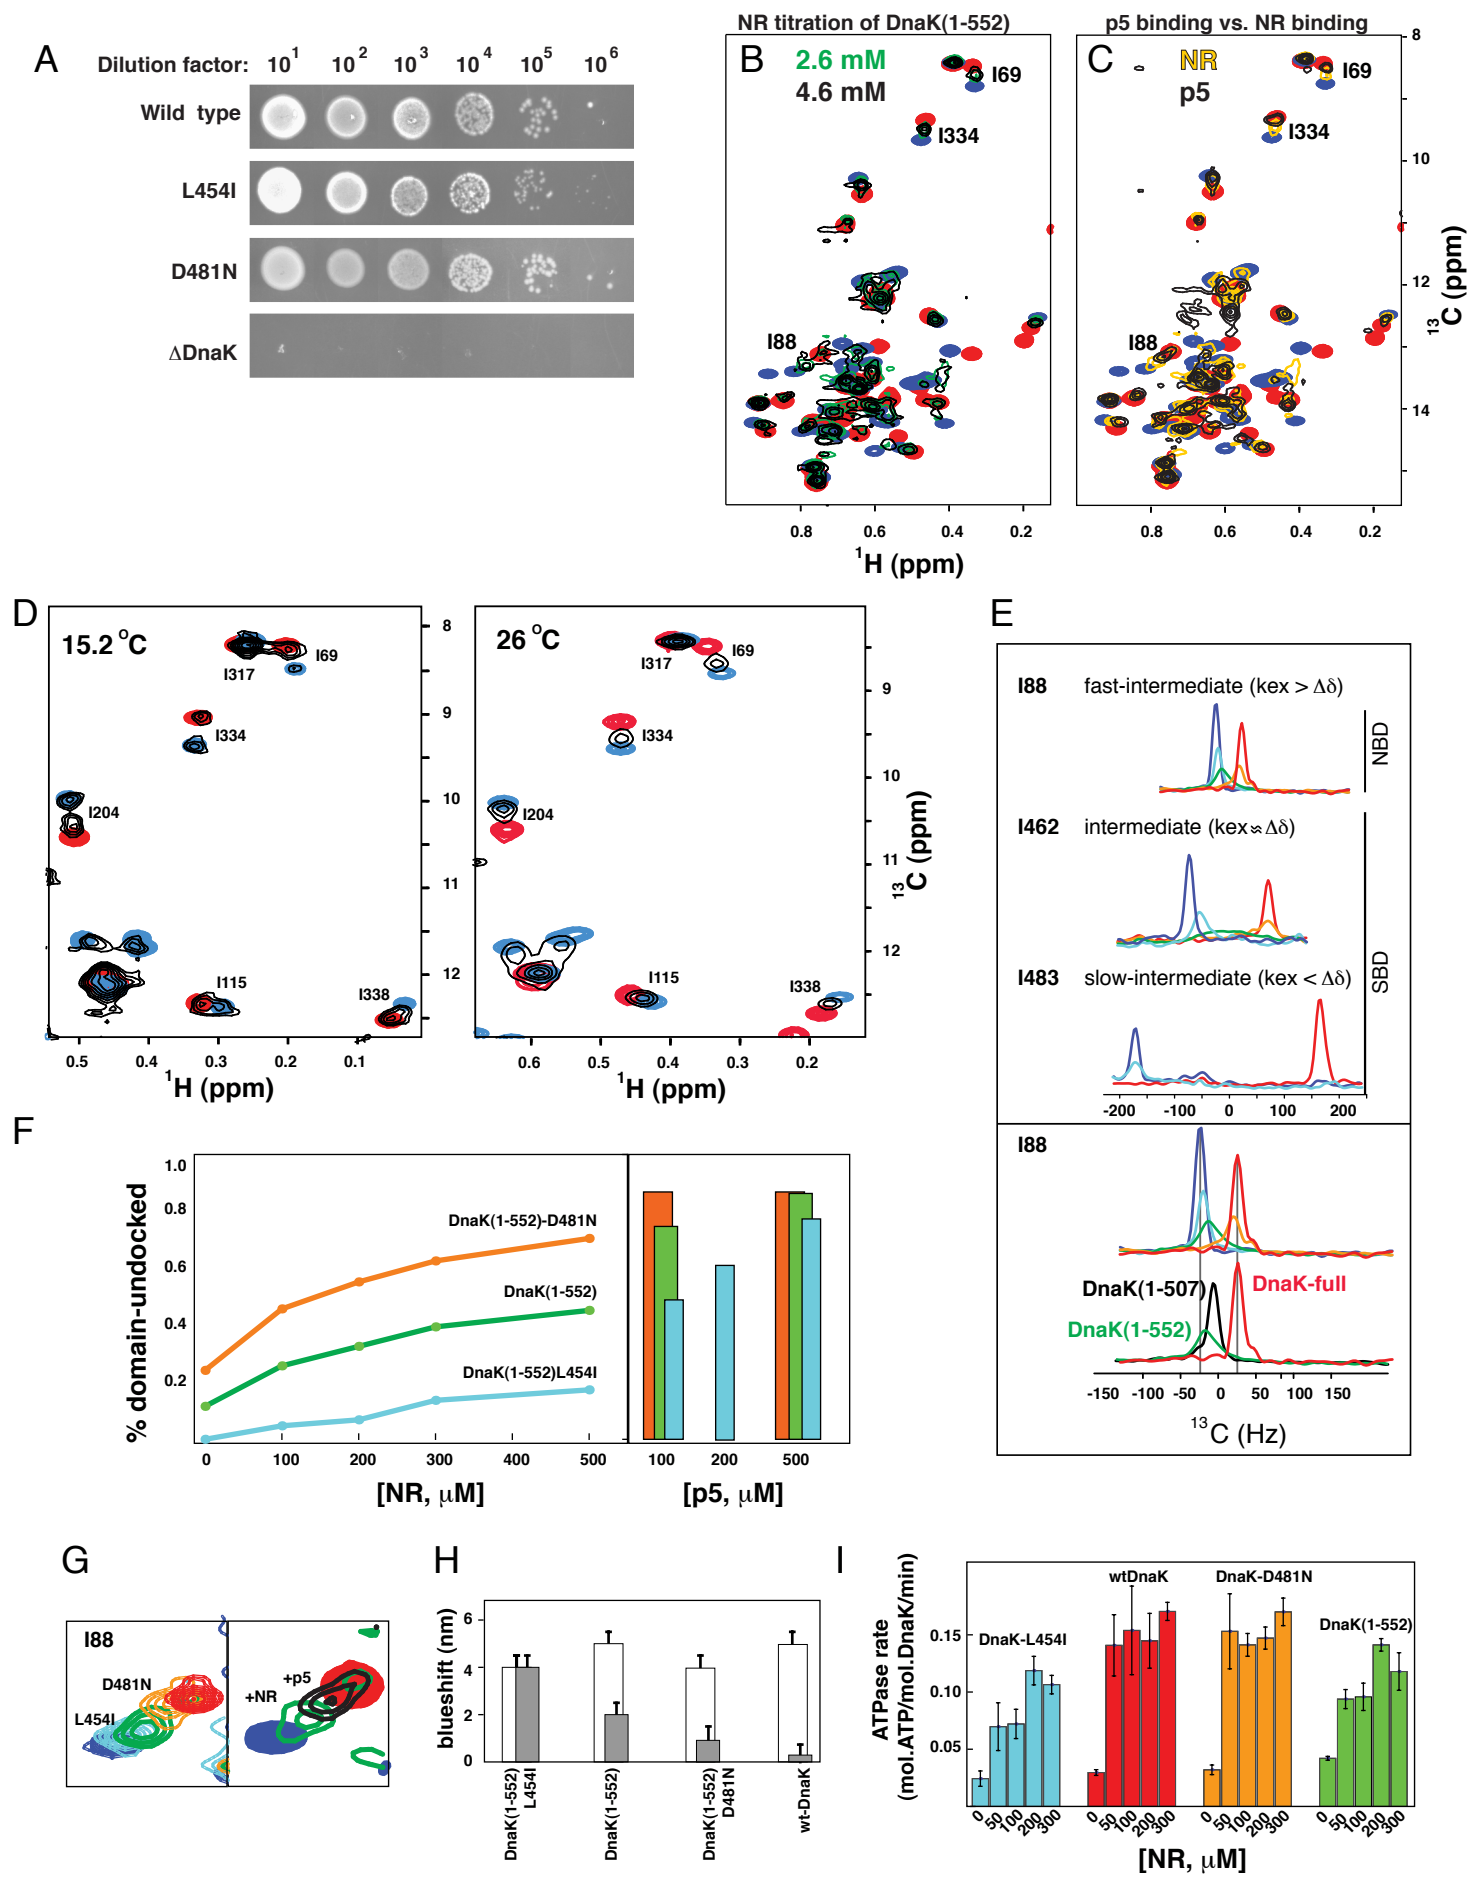

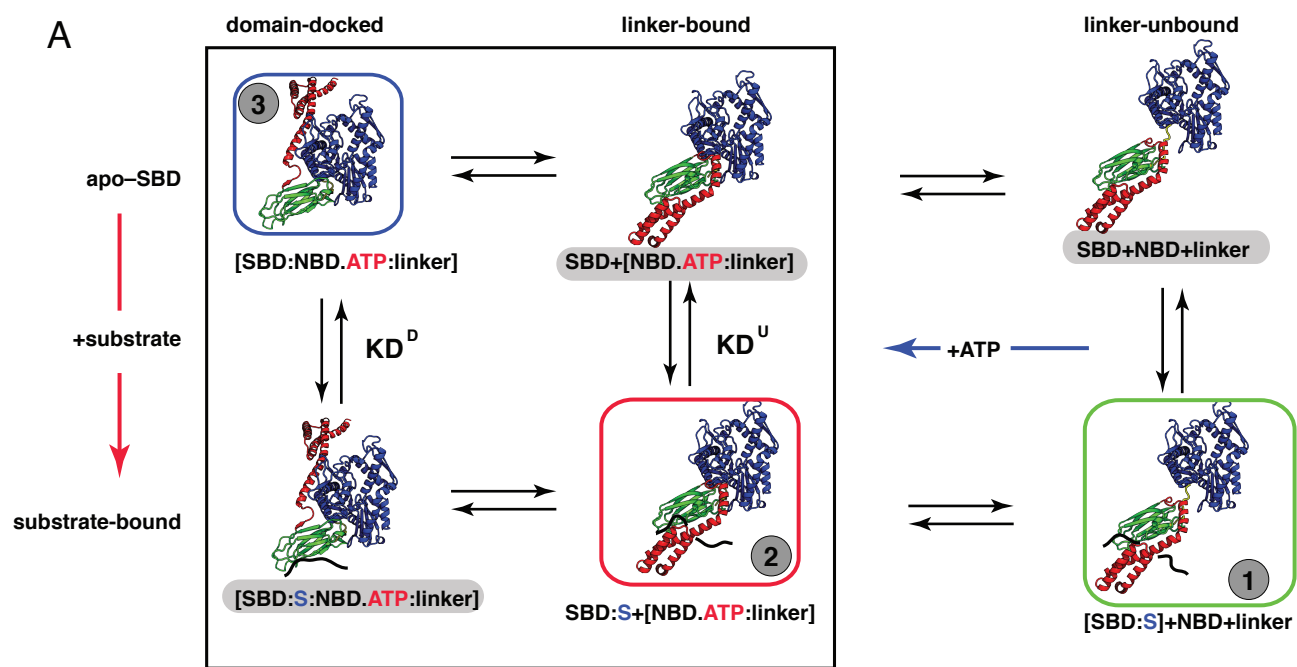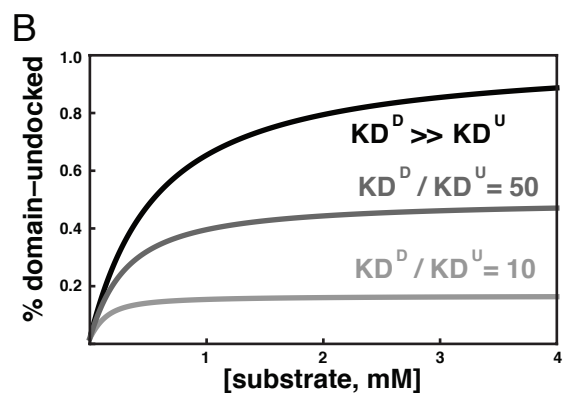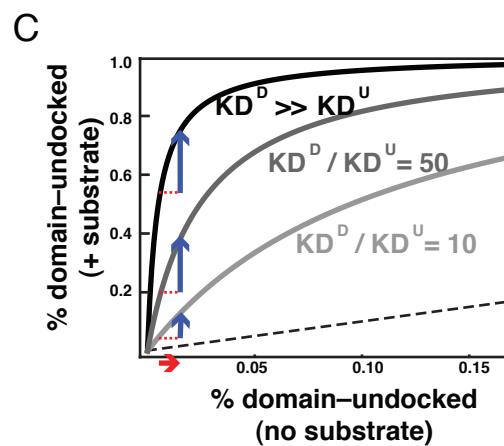

Supplement: NIHMS419991-supplement-02.pdf [file NIHMS419991-supplement-02.pdf]
